# Supplementary material for: CAR T cells and T cells phenotype and function are impacted by glucocorticoid exposure with different magnitude
Source: Springer Nature journal article supplement (doi:10.1186/s12967-024-05063-4), 2024-03-12
Supplement: MOESM1 [file 26853864]

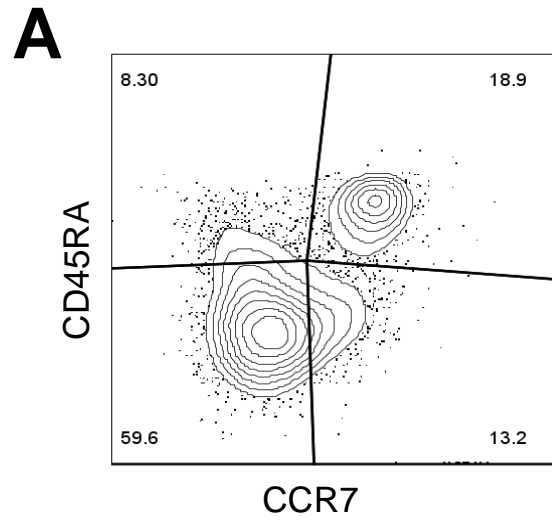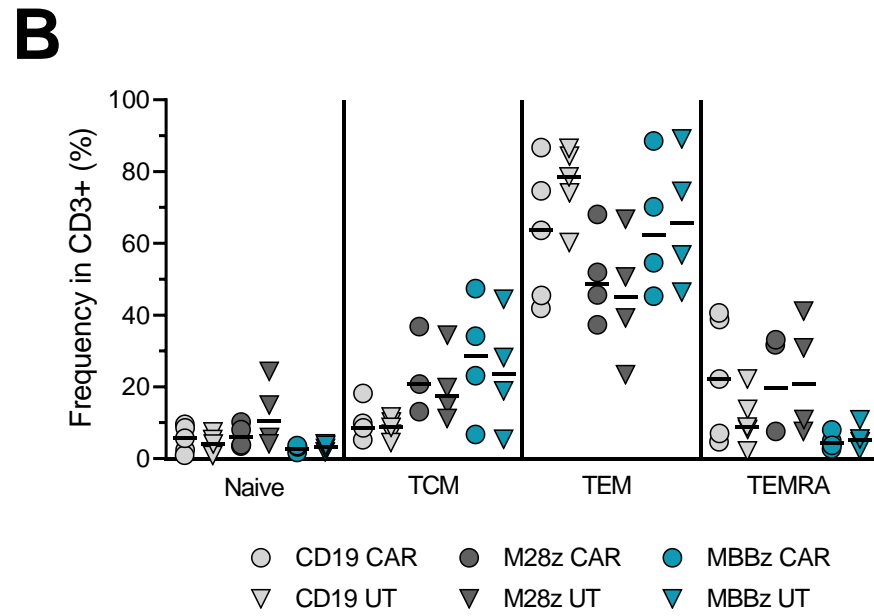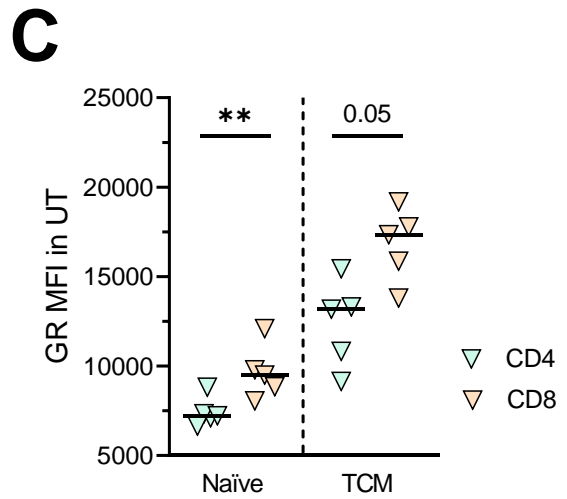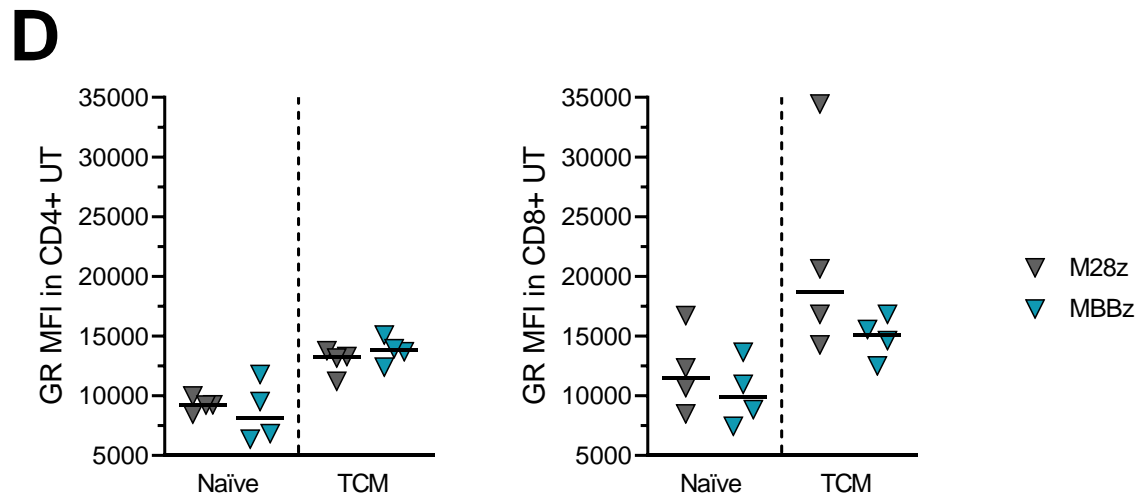

Suppl Figure 2

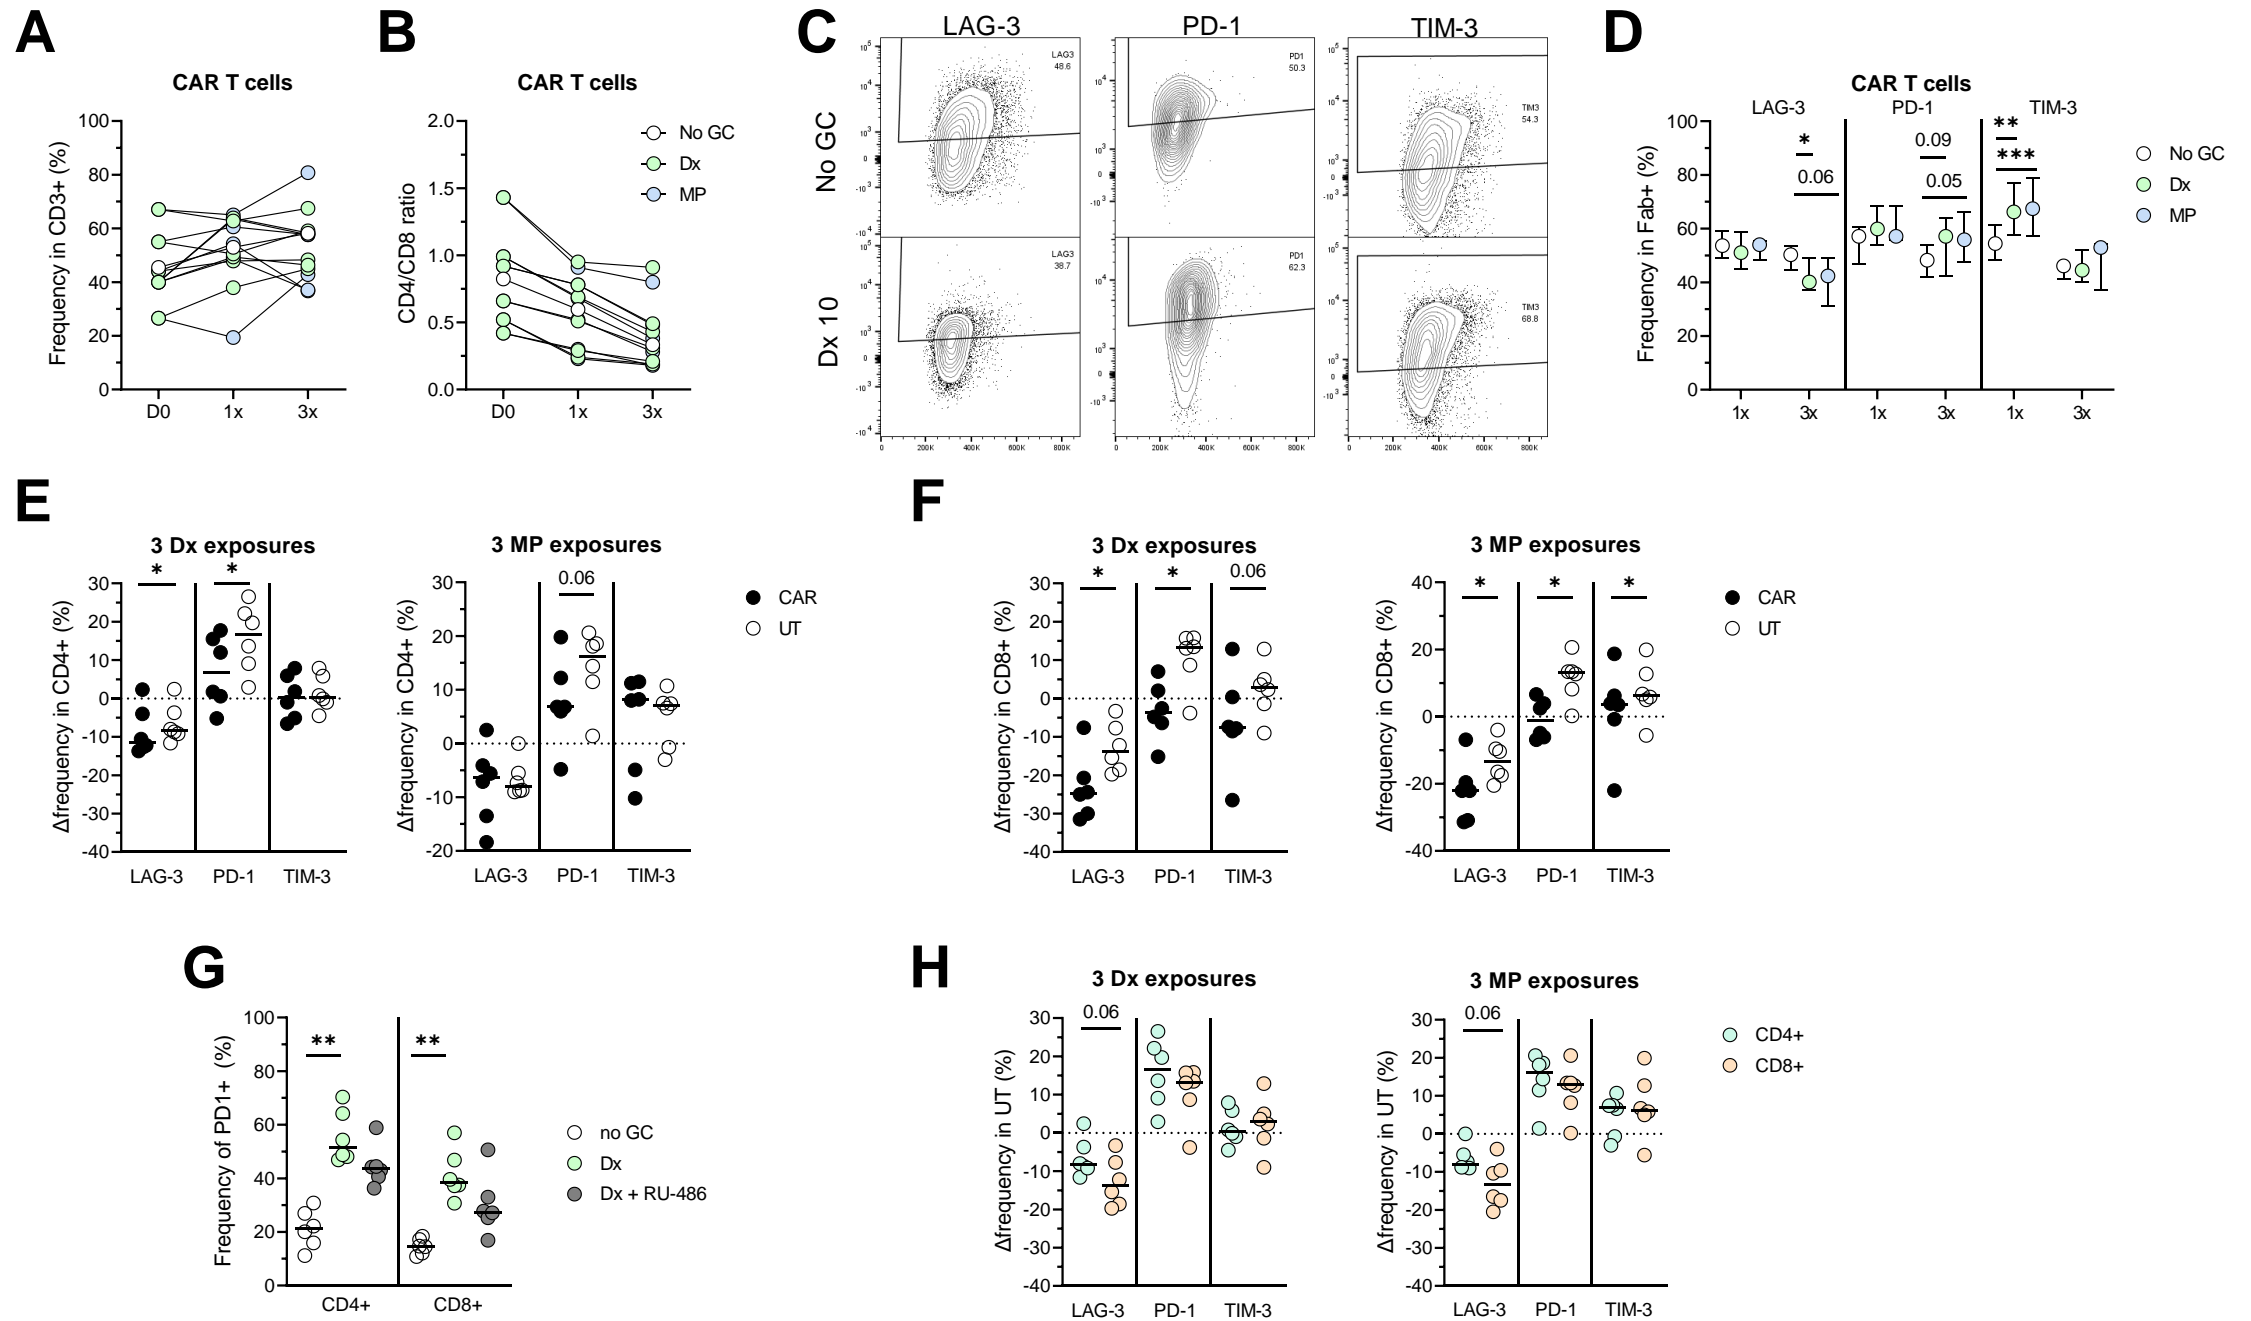

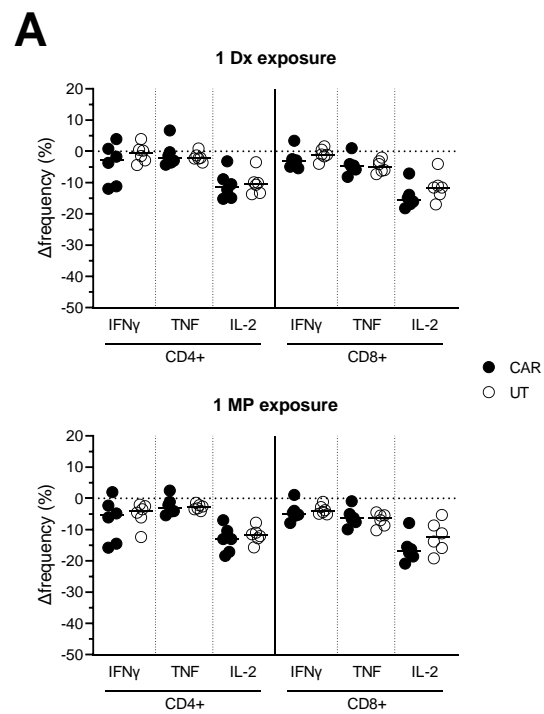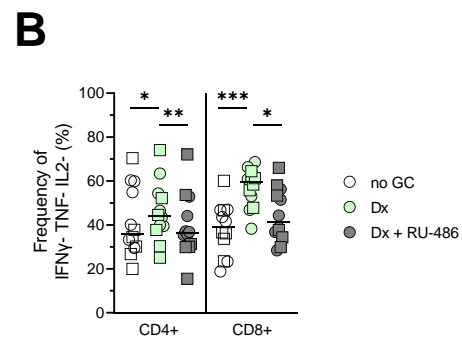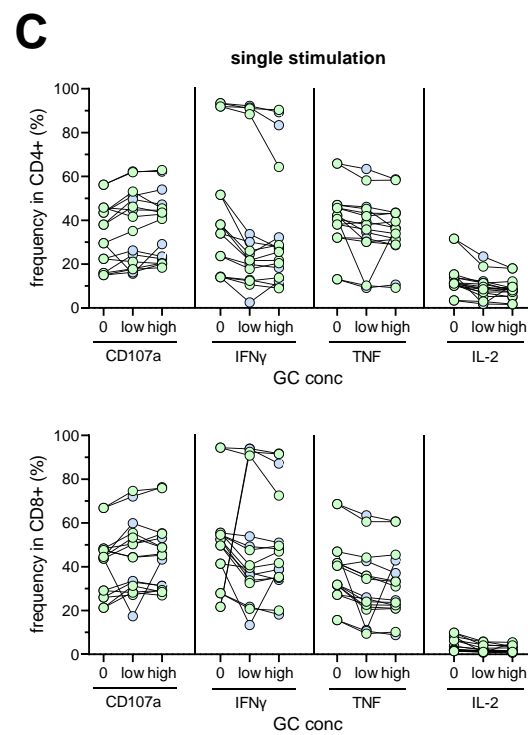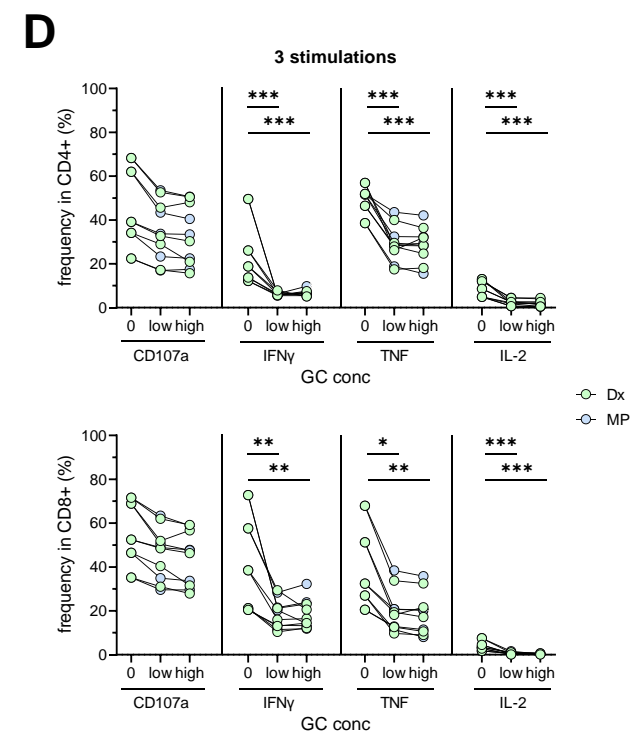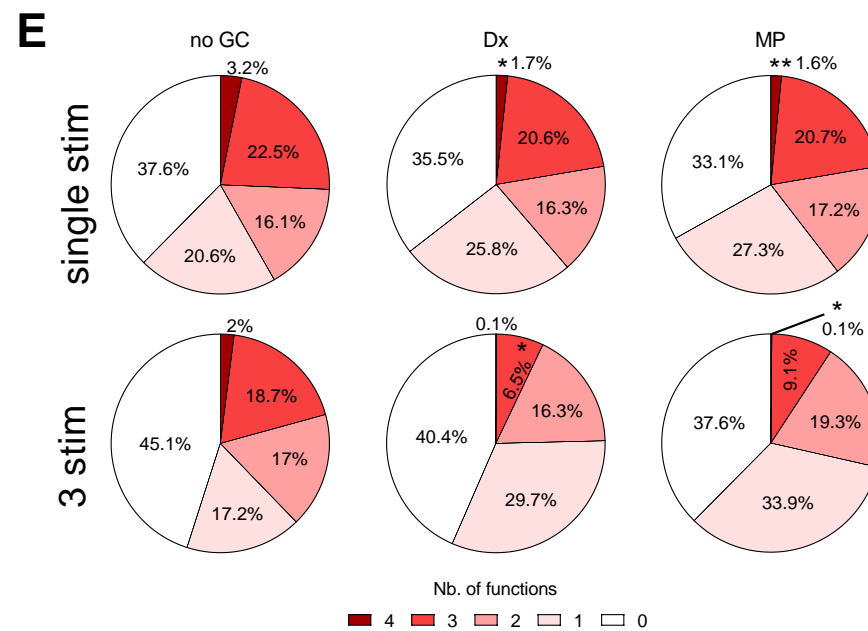

Suppl Figure 4

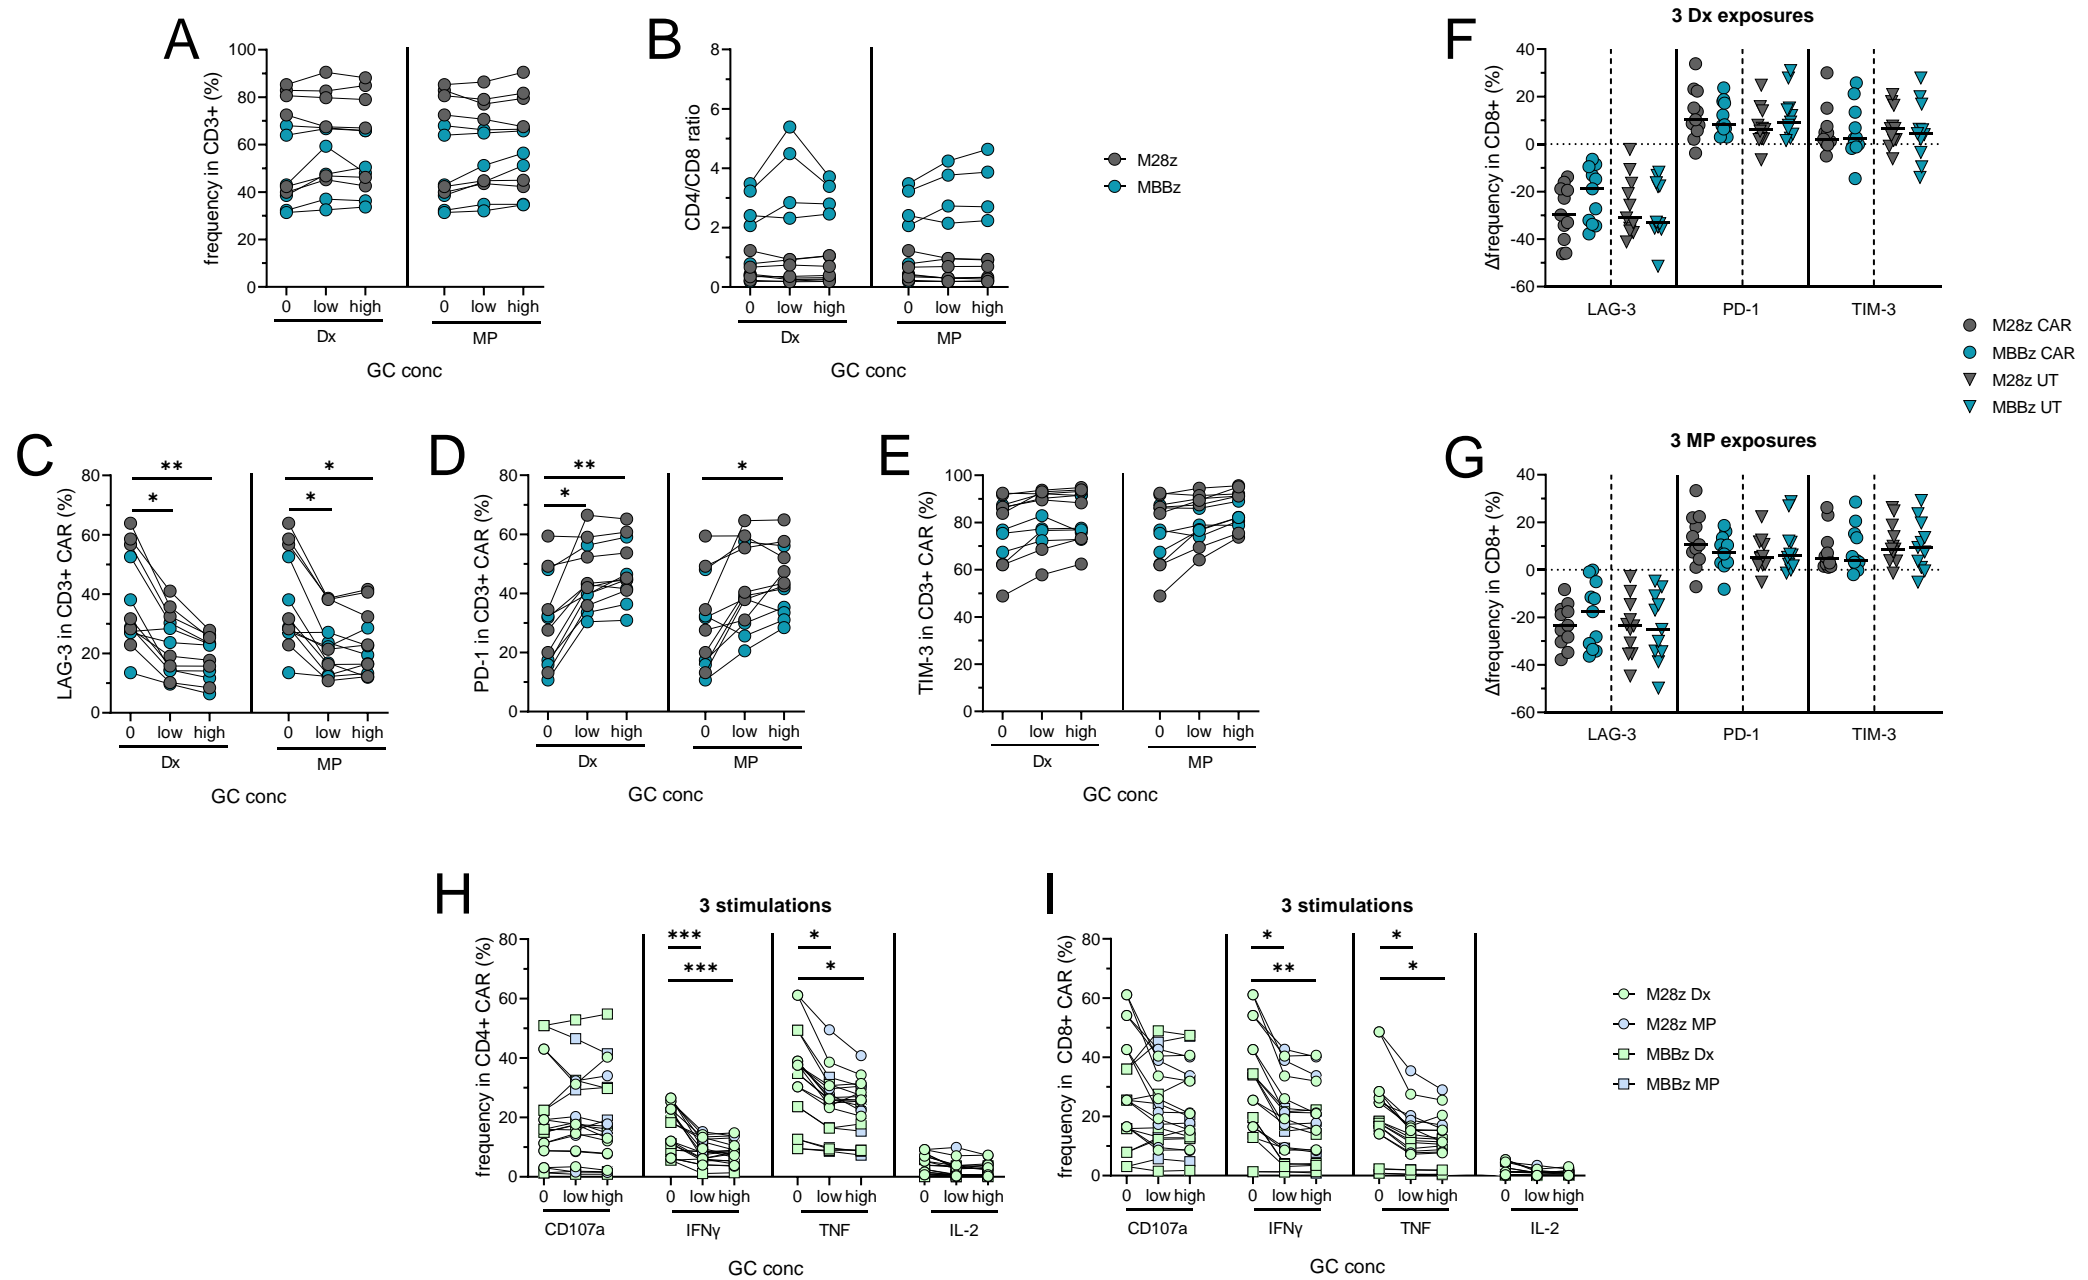

**A**

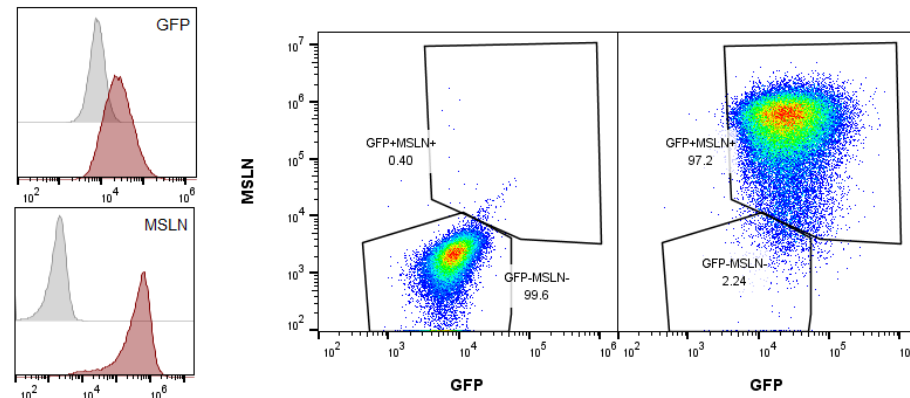

**B**

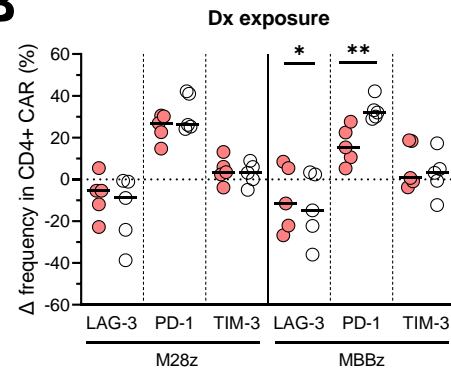

**D**

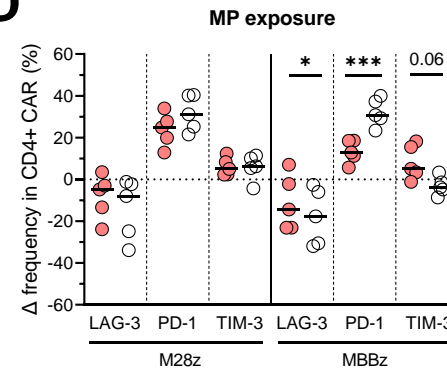

**C**

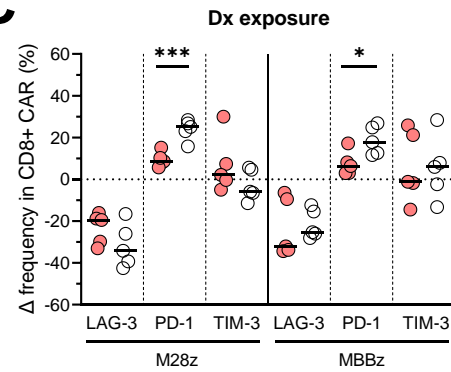

**E**

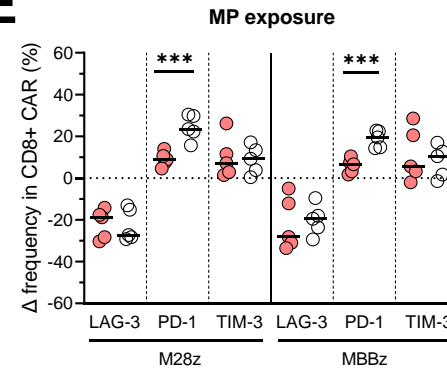

● 3x GC exposure  
○ 48h rested GC free
